# Supplementary material for: Diffusion of nanoparticles within a semidilute polyelectrolyte solution
Source: Royal Society of Chemistry journal article supplement (doi:10.1039/c9sm01313j), 2019-01-01
Supplement: c9sm01313j1.pdf [file c9sm01313j1.pdf]

**Supporting information**

Diffusion of Nanoparticles within a Semidilute Polyelectrolyte Solution

Kavindya K. Senanayake, Namita Shokeen, Ehsan Akbari Fakhrabadi, Matthew W. Liberatore,  
and Ashis Mukhopadhyay

### SI1: Concentration calculations for PAA samples

Density of PAA = 1.150 g/ml at 25°C<sup>1</sup>

#### Calculated concentrations

| Weight fraction (w/w) | C (kg/m <sup>3</sup> ) | Volume fraction (v/v) |
|-----------------------|------------------------|-----------------------|
| 0.00042               | 0.42                   | 0.00037               |
| 0.00083               | 0.83                   | 0.00072               |
| 0.00125               | 1.25                   | 0.00109               |
| 0.0017                | 1.72                   | 0.00148               |

### SI2: Fitting of autocorrelation function in Fig. 1

$$G(\tau) = \frac{G(0)}{1 + \left(\frac{8D\tau}{\omega_0^2}\right) \sqrt{1 + \left(\frac{8D\tau}{z_0^2}\right)}}$$

D: Diffusion coefficient

$\omega_0$ : Half-width of laser focus

$z_0$ : Half-height of laser focus

### SI3: Experimental Diffusion coefficient

Experimental diffusion coefficients D of AuNPs (in  $\mu\text{m}^2/\text{s}$ ) as measured by fluorescence correlation spectroscopy

| $\Phi$ ( $\times 10^{-3}$ ) | d=5 nm |            | d=20 nm |            | d=40 nm |            |
|-----------------------------|--------|------------|---------|------------|---------|------------|
|                             | D      | $\delta D$ | D       | $\delta D$ | D       | $\delta D$ |
| 0                           | 102    | 5          | 23      | 1          | 11      | 1          |
| 0.37                        | 51     | 1          | 14      | 1          | 7       | 1          |
| 0.72                        | 40     | 3          | 11      | 1          | 4       | 1          |
| 1.09                        | 30     | 2          | 9       | 0.4        | 5       | 0.3        |
| 1.48                        | 23     | 1          | 7       | 1          | 3       | 0.2        |

**SI4: Fitting parameters  $\beta$  and  $\nu$  using Phillies equation:  $D=D_0 \exp(-\beta\phi^\nu)$**

| <b>d (nm)</b> | <b><math>\nu</math></b> | <b><math>\beta</math></b> |
|---------------|-------------------------|---------------------------|
| 5             | 0.53                    | 4.00                      |
| 20            | 0.64                    | 4.10                      |
| 40            | 0.68                    | 4.41                      |

**SI5: Debye screening length ( $l$ ) Calculations**

$$\frac{1}{l} = \sqrt{\frac{\sum Z_i^2 e^2 \alpha n_i(0)}{\epsilon_r \epsilon_0 k_B T}}$$

$$\frac{1}{l} = \sqrt{\frac{\sum Z_i^2 e^2 \alpha C_i N}{\epsilon_r \epsilon_0 k_B T}}$$

where,

$i$ = species of ions

$n_i(0)$ = density of ions at  $\vec{r} = 0$

$Z_i$ = valance of charge (=1)

$C_i$ =H<sup>+</sup> concentration

$\epsilon_r$ = relative permittivity (=80)

$\epsilon_0$ = permittivity in vacuum ( $8.85 \cdot 10^{-12}$  F/m)

$N$ = Avogadro's number ( $=6.022 \cdot 10^{23}$  mol<sup>-1</sup>)

$e$ = charge of the electron ( $=1.609 \cdot 10^{-19}$  C)

$k_B$ = Boltzmann constant ( $=1.38 \cdot 10^{-23}$  J/K)

$T$ = absolute temperature (=295 K)

$\alpha$  = Ionization factor<sup>2</sup>

Assumptions:

one monomer emits one H<sup>+</sup> ion

$$pH = -\log[H^+]$$

$$[H^+] = -\text{antilog}(pH)$$

$$l = \frac{1.36 * 10^{-8}}{\sqrt{\alpha[H^+]}}$$

### Calculated Debye screening length

| Volume fraction<br>$\Phi$ ( $\times 10^{-3}$ ) | pH   | Ionization factor<br>( $\alpha$ ) {Choi, 2005 #19} | $[H^+]$ (mol/m <sup>3</sup> ) | Debye screening length<br>(l) (nm) |
|------------------------------------------------|------|----------------------------------------------------|-------------------------------|------------------------------------|
| 0.37                                           | 4.20 | 0.073                                              | 0.063                         | 55                                 |
| 0.72                                           | 4.10 | 0.067                                              | 0.080                         | 49                                 |
| 1.09                                           | 3.61 | 0.060                                              | 0.25                          | 28                                 |
| 1.48                                           | 3.43 | 0.051                                              | 0.37                          | 23                                 |

### SI6: Dynamic light Scattering Results

Average hydrodynamic radius of PAA :  $R_h=137$  nm

For PAA <sup>3</sup>,

$$\frac{R_g}{R_h} = 1.45$$

Radius of Gyration of PAA ( $R_g$ )

$$R_g = 1.45 * 137 \text{ nm}$$

$$R_g = 198 \text{ nm}$$

Overlap Concentration ( $c^*$ )

$$c^* = \frac{M_w}{\frac{4}{3}\pi N_{av} R_g^3}$$

$$c^* = \frac{1000000 * 10^{-3} \text{ kgmol}^{-1}}{\frac{4}{3} * \pi * 6.02 * 10^{23} \text{ mol}^{-1} * (198.10^{-9})^3 \text{ m}^3}$$

$$c^* = 0.05 \frac{\text{kg}}{\text{m}^3}$$

Overlap volume fraction,  $\phi^*=4.4 \times 10^{-5}$

### SI7: Correlation length ( $\xi$ ) calculation

### Correlation length ( $\xi$ )<sup>4</sup>

$$\frac{\xi}{R_g} = \left(\frac{c}{c^*}\right)^{-\frac{1}{2}}$$

$$\xi = \frac{R_g * \sqrt{4.4 \times 10^{-5}}}{\sqrt{c}}$$

### Calculated correlation length for each concentration

| Volume fraction (v/v) | $\xi$ (nm) |
|-----------------------|------------|
| 0.00037               | 69         |
| 0.00072               | 49         |
| 0.00109               | 40         |
| 0.00148               | 34         |

### The size-ratio $d/\xi$ for each particle size in different concentration

| Volume fraction (v/v) | $\xi$ (nm) | $d/\xi$ |         |         |
|-----------------------|------------|---------|---------|---------|
|                       |            | d=5 nm  | d=20 nm | d=40 nm |
| 0.00037               | 69         | 0.07    | 0.29    | 0.58    |
| 0.00072               | 49         | 0.10    | 0.41    | 0.81    |
| 0.00109               | 40         | 0.13    | 0.50    | 1.00    |
| 0.00148               | 34         | 0.15    | 0.59    | 1.17    |

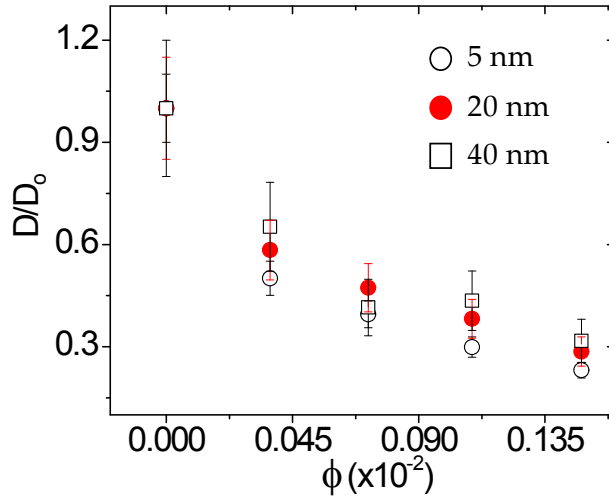

SI8: Normalized diffusion coefficient vs. PAA volume fraction

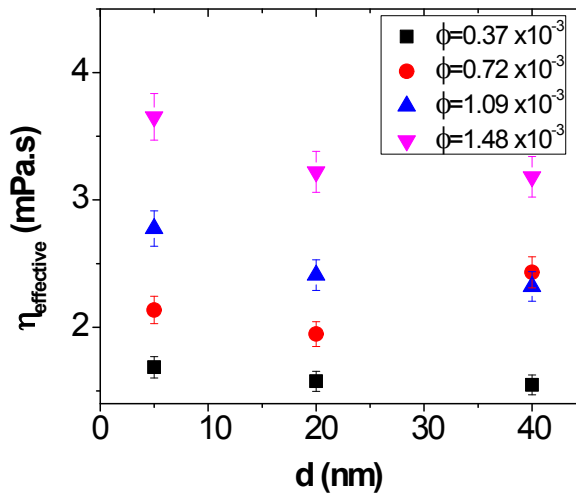

SI9: The effective viscosity as a function of NP size at a constant volume fraction of PAA

Reference

1. Lin, T. H.; Phillies, G. D. *J. Phys. Chem.* **1982**, 86, (20), 4073-4077.
2. Choi, J.; Rubner, M. F. *Macromolecules* **2005**, 38, (1), 116-124.
3. Reith, D.; Müller, B.; Müller-Plathe, F.; Wiegand, S. *J. Chem. Phys.* **2002**, 116, (20), 9100-9106.
4. Dobrynin, A.; Rubinstein, M., *Theory of polyelectrolytes in solutions and at surfaces*. 2005; Vol. 30, p 1049-1118.
